# Supplementary material
Source: Springer Nature journal article supplement (https://www.springermedizin.de/resource/supplementary/13024_2009_581_MOESM4_ESM.pdf/9643422)

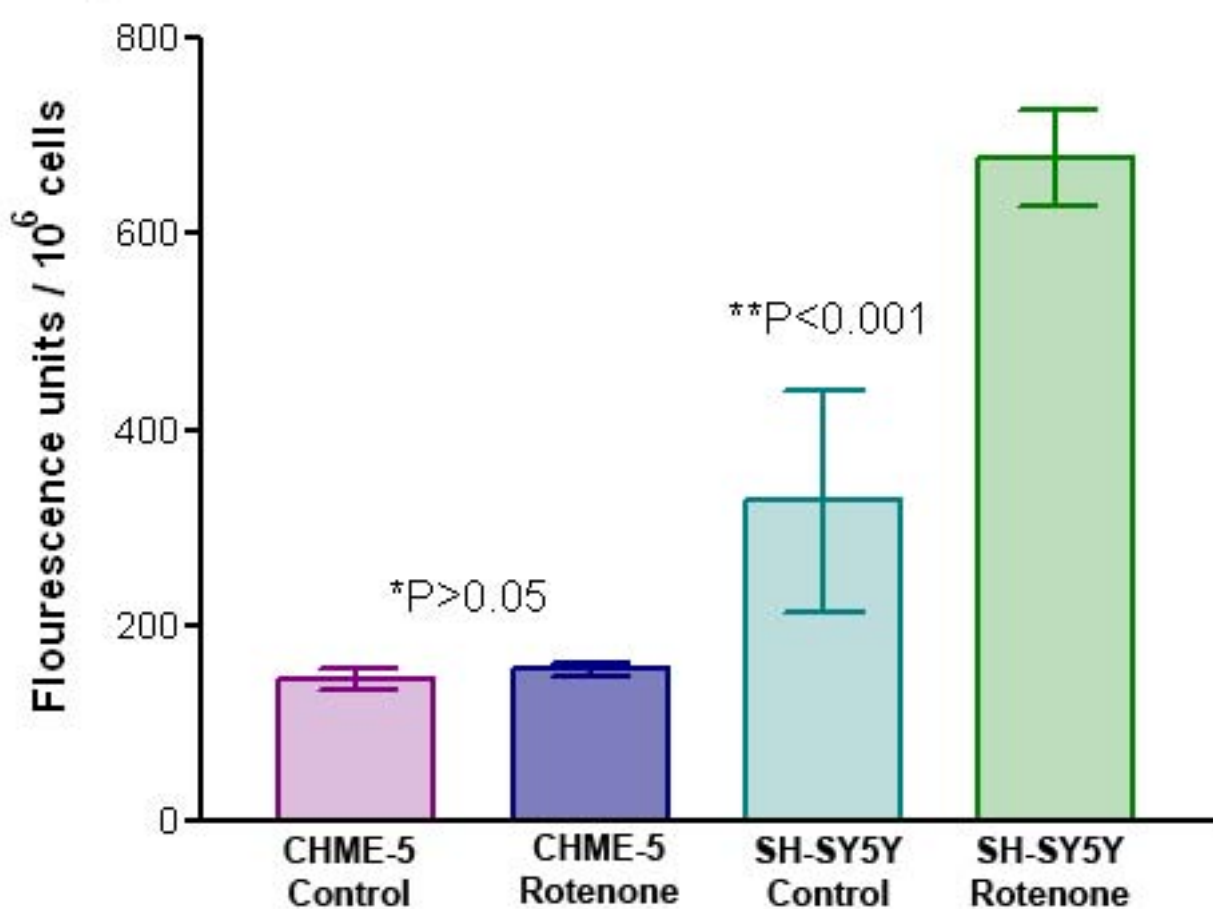

Supplement: MOESM4 [file 9643422]
